# Supplementary material
Source: ML conference proceedings conference paper supplement (https://openaccess.thecvf.com/content/ICCV2021/html/Bednarik_Temporally-Coherent_Surface_Reconstruction_ICCV_2021_paper.html)
Supplement: Supplementary file 1 [file Bednarik_Temporally-Coherent_Surface_Reconstruction_ICCV_2021_supplemental.zip › 05754-supp.html]

Temporally-Coherent Surface Reconstruction via Metric-Consistent Atlasess


Temporally-Coherent Surface Reconstruction   
 via Metric-Consistent Atlasess

Supplementary video

Jan Bednarik1  Vladimir G. Kim2  Siddhartha Chaudhuri2  Shaifali Parashar1     
Mathieu Salzmann1  Pascal Fua1  Noam Aigerman1

1EPFL, Lausanne, Switzerland    2Adobe Research
